# Supplementary material for: GATA6 Is a Crucial Regulator of Shh in the Limb Bud
Source: PubMed Central journal article supplement (PMC3886911; doi:10.1371/journal.pgen.1004072), 2014-01-09
Supplement: pgen.1004072.s001.pdf [file pgen.1004072.s001.pdf]

# GATA6

WT

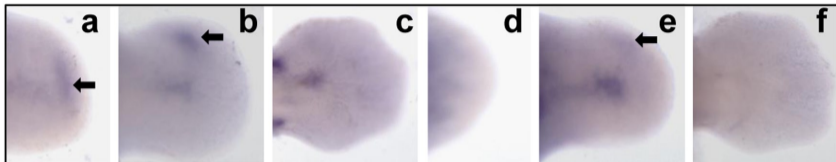

Prx1-Cre;  
GATA6 fl/fl

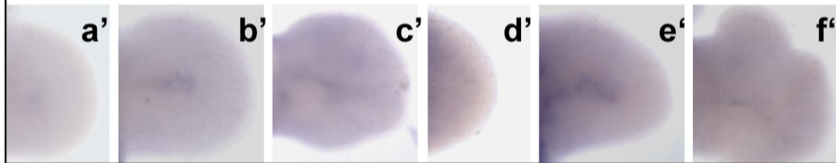

E10.5

E11.5

E12.5

E10.5

E11.5

E12.5

Forelimb

Hindlimb
