# Supplementary material for: GATA6 Is a Crucial Regulator of Shh in the Limb Bud
Source: PubMed Central journal article supplement (PMC3886911; doi:10.1371/journal.pgen.1004072), 2014-01-09

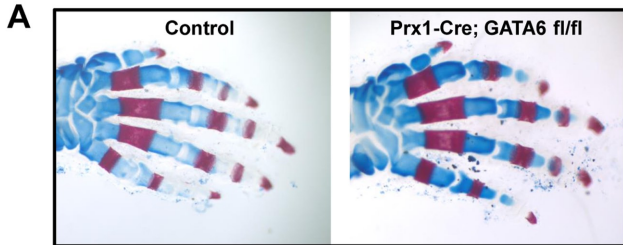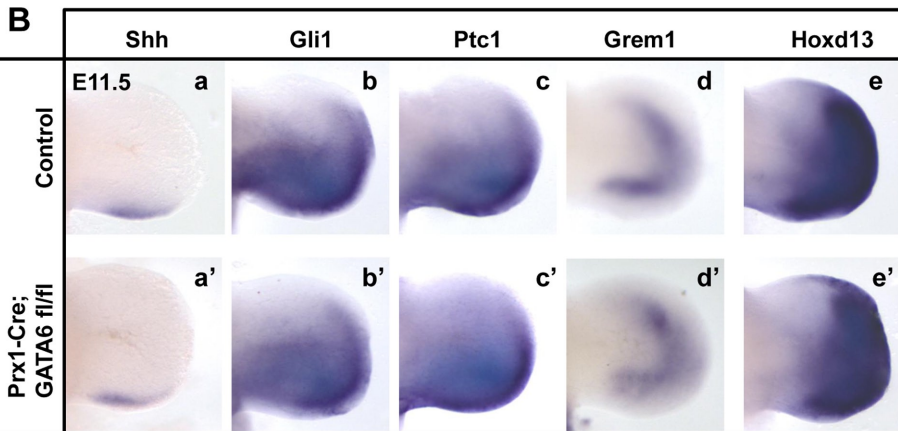

Supplement: pgen.1004072.s002.pdf [file pgen.1004072.s002.pdf]
