# Supplementary material for: GATA6 Is a Crucial Regulator of Shh in the Limb Bud
Source: PubMed Central journal article supplement (PMC3886911; doi:10.1371/journal.pgen.1004072), 2014-01-09

**A**

| Position | Sequence           | Oligo # |
|----------|--------------------|---------|
| -2331    | ATG <u>GATT</u> GC | 1       |
| -2323    | CTG <u>GATT</u> GG | 1       |
| -2127    | TTG <u>A</u> TATG  | 2       |
| -1907    | GAG <u>A</u> TATA  | 3       |
| -1425    | CAGATAAG*          | 4       |
| -973     | GTG <u>A</u> TAGG  | 5       |
| -947     | AAG <u>A</u> TTC   | 6       |

**B**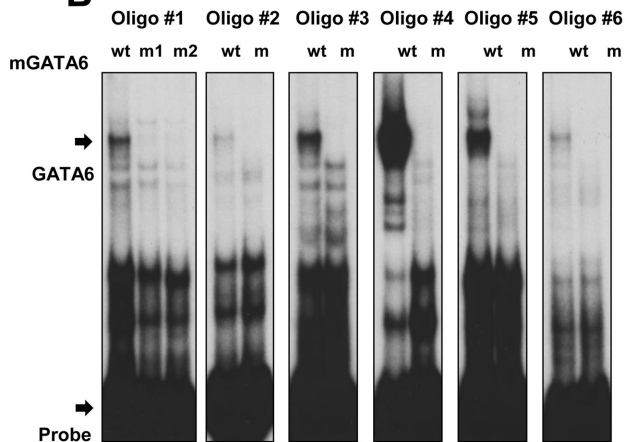**C**

human CCATTATCTC  
mouse CCCTTATCTG

**D**

| Position | Sequence           | Oligo # |
|----------|--------------------|---------|
| 612      | AAG <u>A</u> TAGG  | 7       |
| 619      | TTG <u>A</u> TTC*  | 7       |
| 1348     | GAG <u>A</u> TATG* | 8       |

**E**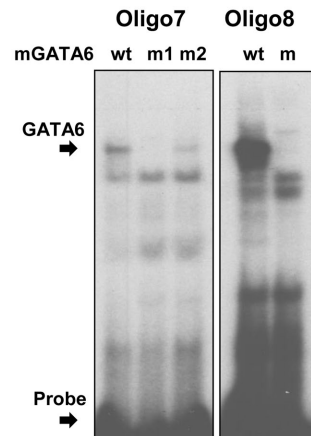**F**

human TTTGATTTGA  
mouse TTTGATTTGA

human CCATATCTCA  
mouse TCATATCTCA

**G**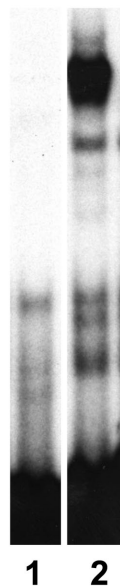

Supplement: pgen.1004072.s004.pdf [file pgen.1004072.s004.pdf]
